# Supplementary material for: Narrative Dentistry as a Technique to Connect Dental Students with Lives Diminished Through Oral Disease
Source: Research Square preprint supplement (doi:10.21203/rs.3.rs-7172753/v1), 2025-08-01
Supplement: Supplementary file 1 [file 1e6a158c13d1c88a1b6f4ed2.docx]

**For Want of a Tooth**

**For Want of a Tooth**

**For want of a tooth, the peace was lost.**

**For want of peace, the holiday was lost.**

**For want of a holiday, the choice was lost.**

**For want of a choice, the crown was lost.**

**For want of a crown, the root was lost.**

**For want of a root, the person was lost.**

**And all for the want of a tooth.**

**For want of a tooth,**

I had a tooth in the back of my mouth. Well, I had many teeth in the back of my mouth, but this one was different. It was the tooth... second from the back, on my lower half. I never noticed it much, to be honest. I didn’t realise how much of an impact the tooth played in my life until there was a sudden, unbearable pain, coming and going like the tides of an ocean every time liquid touched it.

I went to my dentist who put in a filling, saying the pain would resolve in a few days.

The pain lessened but it did not resolve. I had the filling for a year.

I had a holiday planned.

I went on my holiday.

The filling cracked and so did my peace.

**Peace was lost.**

**For want of peace,**

We had planned the holiday for months, made a vow that after the years we’d gotten through, we’d make a spiritual retreat, go back to our roots.

But now the healing I needed was not spiritual in nature. I couldn’t eat I couldn’t drink I couldn’t speak I couldn’t think. The pain was *blinding*.

I was desperate for a fix, a solution, something that would give me my tooth back and allow me to spend the holiday as planned.

I was crying every night.

Spoiler, I did not get the holiday I wanted.

That’s what led me to the decision I made.

**The holiday was lost.**

**For want of a holiday,**

Ideally, I would’ve gotten my treatment back in Australia, with my general dentist. He’s a good guy, someone I trust and recommend to all family and friends. But we could talk in ideals all we like.

My pain had not eased. I was desperate.

I chose to get treatment done in my country. I’ve had fillings and crowns put in by the same dentist before, but that was years ago, when he was young and passionate.

He said I needed a root canal and crown, to be honest I would have agreed to anything to get rid of the pain.

He did the root canal filling in one day, the crown a week later.

For a while, it was fine

**The choice was lost.**

**For want of a choice,**

When I came back to Australia is when it fell apart.

Literally.

A few months after my holiday, I was in pain again. There was a foul smell from the tooth. I couldn’t eat on that side. I had a headache. My ears were buzzing.

Two days later, while I was eating, the crown fell off.

I took it to my dental clinic.

They didn’t mince words. There was an infection and I’d need antibiotics as well as more treatment.

They cut the remaining tooth shorter and smaller, it was a tiny but confronting little nub.

They fitted on another crown.

**The crown was lost.**

**For want of a crown,**

It’s been about a year since then, but last week the second crown fell off.

I took it back to the dental clinic, to show them the situation.

They told me there was no salvaging it. There was no tooth left for a crown anymore. There is only a root left now, and nothing beyond that.

Apparently they’d told me last time there was poor prognosis for the tooth, and that an implant would have been the best option. I don’t think they did. I wouldn’t have chosen another crown, had I known it would only last the year. Crowns don’t come cheap and I’m not made of money.

I went home that night, fuming.

And still in pain

**The root was lost.**

**For want of a root,**

Yesterday, they did the extraction. They took out the little bit that I had left.

I’ve come to terms with it.

I suppose there’s nothing left for me to say.

I did not realise the value of the tooth when there was no issue with it, but now there’s a gaping hole in my mouth. It feels as though I’ve lost a limb.

I am not sure how I will feel about the implant they will put in, with the pain the original tooth put me through and journey it took me on.

**The person was lost.**
